# Supplementary material for: Brief communication: Improved measurement of ice layer density in seasonal snowpacks
Source: Copernicus journal article supplement (doi:10.5194/tc-10-2069-2016), 2016-09-14
Supplement: Supplementary file 1 [file tc-2015-185-supplement.xlsx]

## Sheet: Sheet1
Natural layer @ NB				Artificial layer @ NB				Natural Iayer @ CARE				Artificial layer @ Inuvik				Bubble size measurements at North Bay
Mass (g)	Volume (ml)	Thickness (mm)		Mass (g)	Volume (ml)	Thickness (mm)		Mass (g)	Volume (ml)	Thickness (mm)		Mass (g)	Volume (ml)	Thickness (mm)		All in mm
5.35	6.024	3		6.14	6.82497	5		4.41	5.246	7		4.238	5	3		NB_N	NB_A
5.21	6.025	3		6.9	7.86179	5		5.87	6.881	7		6.078	7.1265	2		0.2	0.1
4.63	5.594	3		4.77	5.50473	5		4.89	5.7	8		4.501	5.2553	2		0.2	0.05
5.09	5.963	3		6.48	7.39218	4		6.74	7.836	9		4.39	5.0781	2		0.2	0.05
5.82	6.645	4		8.13	9.30075	5		5.54	6.412	8		6.412	7.411	2		0.5	0.05
7.65	8.86095	2		5.27	5.76095	4		4.68	5.416	9		5.009	5.774	2		0.05	0.05
5.43	6.64517	3		4.21	4.72081	6		4.46	5.154	8		7.526	8.6616	2		0.05	0.1
6.97	7.94383	4		4.63	5.17	7		5.08	5.868	9		5.032	5.7886	2		0.1	0.1
7.08	8.27021	4		5.86	6.559	6		5.4	6.234	8		5.5	6.3167	3		0.2	0.1
3.33	3.968	3		4.22	4.645	6		5.19	5.954	9		6.441	7.3927	2		0.05	0.1
2.99	3.453	3		3.59	4.084	4		5.7	6.526	8		6.509	7.4105	2		0.1	0.1
5.4	6.227	3		4.27	4.732	6		7.05	8.058	8		9.081	10.2669	1		0.2	0.05
4.43	5.20585	3		4.37	4.97	4		7.28	8.314	8		7.422	8.3873	2		0.3	0.05
3.98	4.532	4		4.67	5.13	6		5.23	5.953	8		8.382	9.4347	2		0.05
5.81	6.563	2		3.28	3.731	5		5.28	6.007	9		7.143	8.036	2		0.1
5.44	6.31139	3		6.61	7.462	6		5	5.687	9		7.184	8.0603	2
								4.01	4.554	8		6.591	7.3937	3
								9.1	10.33	8		10.844	12.152	2
								6.12	6.942	8		5.006	5.5968	2
								6.36	7.194	8		3.08	3.4303	2
								4.14	4.672	8		9.089	10.0219	2
								2.9	3.269	8		6.231	6.8485	2
								3.86	4.347	9		5.623	6.1675	1
								8.28	9.304	8		2.532	2.775	2
								5.39	6.051	8		8.698	9.5297	2
								5.22	5.854	8		8.561	9.3717	3
								7.64	8.561	9		4.754	5.174	3
								3.45	3.863	8		4.294	4.6729	2
								6.19	6.914	9		7.59	8.2547	2
								5.3	5.919	9
