# Supplementary material for: Brief communication: Improved measurement of ice layer density in seasonal snowpacks
Source: Copernicus journal article supplement (doi:10.5194/tc-10-2069-2016), 2016-09-14
Supplement: Supplementary file [file tc-10-2069-2016-supplement-title-page.pdf › tc-10-2069-2016-supplement-title-page.pdf]

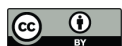

## *Supplement of*

# **Brief communication: Improved measurement of ice layer density in seasonal snowpacks**

**Tom Watts et al.**

*Correspondence to:* Nick Rutter ([nick.rutter@northumbria.ac.uk](mailto:nick.rutter@northumbria.ac.uk))

- [tc-10-2069-2016-supplement-title-page.pdf](#)
- [tc-2015-185-supplement.xlsx](#)

The copyright of individual parts of the supplement might differ from the CC-BY 3.0 licence.
